# Supplementary material
Source: Elsevier journal article supplement (https://www.sciencedirect.com/science/article/pii/S0121812320301675)
Supplement: mmc1 [file S0121812320301675:mmc1.docx]

**ANEXOS**

| **Tabla 1. Datos de laboratorio** | | | | | | | |
| --- | --- | --- | --- | --- | --- | --- | --- |
| **Variables** | **Valores de referencia** | **Admisión** | **Día 5** | **Día 6** | **Día 8** | **Día 11** | **Día 14** |
| **Hemograma** | | | | | | | |
| Leucocitos (células/uL) | 5.000-10.000 | 16.688 | 14.880 | 13.570 | 10.410 | 17.340 | 27.800 |
| Neutrofilos (células/uL) | 36,7-64,1 | 12.090 (72,5%) | 11.530 (77,5%) | 11.210 (82,6%) | 8.670 (83,3%) | 13.720 (79,1%) | 23.510 (84,6%) |
| Linfocitos (células/uL) | 21,2-39,7 | 1.600 (9,6%) | 880 (5.9%) | 750 (5,5%) | 1.150 (11%) | 2.180 (12,6%) | 3.070 (11%) |
| Monocitos (células/uL) | 4,05-12,8 | 1.050 (6,3%) | 1.050 (7,1%) | 610 (4,5%) | 560 (5,4%) | 870 (5,0%) | 970 (3,5%) |
| Eosinofilos (células/uL) | 1-3,9 | 1.900 (11,4%) | 1.370 (9,2%) | 960 (7,1%) | 0.0 (0%) | 540 (3,1%) | 220 (0,8%) |
| Basofilos (células/uL) | 0,01-1 | 40 (0,3%) | 50 (0,4%) | 40 (0,3%) | 30 (0,2%) | 30 (0,2%) | 30 (0,2%) |
| Bandas (%) | 0 | 9 | 3 | 0 | 0 | 0 | 0 |
| Hemoglobina (g/dl) | 14-18 | 11,9 | 10,5 | 12,1 | 11,3 | 10,1 | 7,8 |
| Hematocrito (%) | 45-56 | 38,5 | 33,9 | 38,1 | 34,2 | 30,7 | 23,5 |
| Volumen corpuscular medio (fl) | 80-100 | 83,9 | 82,9 | 82,1 | 80,7 | 81,6 | 82,5 |
| Hemoglobina corpuscular media (pg) | 27-34 | 25,9 | 25,7 | 26,1 | 26,7 | 26,9 | 27,4 |
| Plaquetas (células/uL) | 150.000-450.000 | 579.000 | 506.000 | 589.000 | 911.000 | 744.000 | 575.000 |
| **Química sanguínea** | | | | | | | |
| Proteína C Reactiva (mg/dl) | < 6 |  |  |  | 12 | 48 | 24 |
| Procalcitonina (ng/ml) | 0-0,500 |  |  |  | 0,218 | 0,52 | 0,56 |
| Nitrogeno ureico (mg/dl) | 5,1-18 | 17,1 |  | 10 | 23,8 |  | 21,7 |
| Creatinina (mg/dl) | 0,67-1,17 | 0,78 |  | 0,85 | 0,77 |  | 1,17 |
| Transaminasa ALT/TGP (u/l) | < 26 |  |  |  | 135,6 |  | 70,2 |
| Transaminasa AST/TGO (u/l) | 26-31 |  |  |  | 49,1 |  | 24,1 |
| Albumina (g/dl) | 3,50-5,0 |  |  |  | 3,2 |  | 2,6 |
| Fibrinogeno (mg/dl) | 0-339 |  |  |  |  |  | 462 |
| Acido urico (mg/dl) | 2,1-7,6 |  |  |  |  |  | 4,6 |
| **Citoquímico de orina** | | | | | | | |
| Proteínas (mg/dL) | Negativo | Negativo |  |  | Negativo | 25 | 75 |
| Leucocito / estearasa | Negativo | Negativo |  |  | Negativo | Negativo | Negativo |
| Eritrocitos (celulas/ uL) | Negativo | 25 |  |  | 250 | 250 | 250 |
| **Sedimento urinario** | | | | | | | |
| Hematíes (células x campo) | Negativo | 4 xC |  |  | >20 xC | >20 xC | >20 xC |
| Frescos | Negativo |  |  |  | 50% | 20% | 20% |
| Crenados | Negativo |  |  |  | 50% | 30% | 80% |
| **Inmunológicos** |  |  |  |  |  |  |  |
| Inmunoglobulina E (UI/ml) | 0-60 |  |  |  |  | 312 | 99,5 |
| Inmunoglobulina A (UI/ml) | 90-310 |  |  |  |  | 105 |  |
| Inmunoglobulina G (UI/ml) | 710-1.520 |  |  |  |  | 975 |  |
| Inmunoglobulina M (UI/ml) | 40-157 |  |  |  |  | 73 |  |
| Complemento C3 (mg/dl) | 90-180 |  | 175,1 |  |  |  |  |
| Complemento C4 (mg/dl) | 10,0-40 |  | 28,1 |  |  |  |  |
| ANCA-MPO (U/ml) | 11,0-18 |  | 0,6 |  |  |  |  |
| ANCA-PR3 (U/ml) | 11,0-18 |  | 238,2 |  |  |  |  |
| ANCA: anticuerpo contra el citoplasma del neutrofilo. ANCA-PR3: ANCA contra la proteinasa 3. ANCA-MPO: ANCA contra la mieloperoxidasa. ALT/TGP: alanino amino tranferasa / transaminasa glutámico pirúvica. AST/TGO: aspartato amino transferasa / transaminasa glutámico oxalacética. | | | | | | | |
|
|
